# Supplementary material for: Acute effect of percussion and foam roller massage on flexibility, reactive and explosive strength, and muscular endurance in young adult males: a crossover pilot study
Source: PeerJ. 2025 Oct 30;13:e20304. doi: 10.7717/peerj.20304 (PMC12579856; doi:10.7717/peerj.20304)
Supplement: Supplemental Information 1 [file peerj-13-20304-s001.xlsx]

## Sheet: General
SN.	Name	Weight	Height	Age	%Fat	Muscle	BMI	Leg
1		84.9	182	19	25.9	59.8	25.6	R
2		80.1	172	19	21	60.2	27.1	L
3		46.6	158	19	7.2	41	18.7	R
4		83.8	177	21	13.4	69	26.7	L
5		71.9	175	20	20.7	54.2	23.5	L
6		76.2	176	18	16.7	60.3	24.6	R
7		102.2	193	22	22.2	75.7	27.4	L
8		94.4	188	21	16.7	74.8	26.7	R
9		59.1	172	23	5	53.3	20	L
10		80.8	172	20	20.9	60.7	27.3	R
11		84.6	187	20	19	65.1	24.2	R
12		67.4	160	20	19.8	51.3	26.3	L
13		57.9	183	19	9.6	49.7	17.3	R
14		59.4	175	23	13.4	48.8	19.4	L
15		84	184	20	15.5	67.5	24.8	R
16		84.8	182	22	23.4	61.7	25.6	R
17		67.7	177	18	17.2	53.2	21.6	R
18		84.1	176	19	25.1	59.9	27.2	L
	average	76.1056	177.167	20.1667	17.3722	59.2333	24.1111
	std.	14.1391	8.89977	1.54349	5.89245	9.12256	3.29222

## Sheet: testing
SN.	Name	Intervention	Flexibility	Tcontact	Tflight	Hight	LP	Hop Test	1RM LP	0.7	Block
2		Manual	5	532	312	11.9	502	25	10	-8.9	4
				485	303	11.3	509			53
				475	269	8.9	469
2		Nothing	8	492	304	11.3	556	22
				585	299	11	456
				623	285	10	386
2		TheraG	-5	479	340	14.2	550	35
				525	330	13.3	452
				540	375	15.6	487
3		Nothing	41	470	400	19.6	659	24	45	15.6	3
				604	395	19.1	702			68
				467	396	19.2	659
3		TheraG	25	549	386	18.3	620	32
				519	391	18.7	602
				642	390	18.6	551
3		Manual	25	582	409	20.5	681	36
				526	394	19	608
				700	390	18.6	645
4		TeraG	8	450	469	27	539	58	35	9	3
				432	492	29.7	420			62
				422	489	29.3	351
4		Manual	26	474	471	27.2	463	62
				464	471	27.2	368
				475	468	26.8	384
4		Nothing	19	476	469	27	330	60
				458	467	26.7	407
				415	475	27.7	349
5		Manual	19	354	369	16.7	780	54	95	50.6	3
				370	416	21.2	766			104
				364	408	20.4	829
5		Nothing	21	317	402	19.8	719	55
				338	441	23.8	734
				383	436	23.3	743
5		TheraG	10	352	400	19.6	852	58
				344	422	21.8	844
				334	428	22.5	814
6		Nothing	38	391	437	23.4	441	34	35	8.6	3
				381	439	23.6	387			62
				396	444	24.2	394
6		TheraG	20	378	412	20.8	486	50
				387	439	23.6	533
				369	430	22.7	523
6		Manual	32	425	419	21.5	447	56
				426	443	24.1	421
				416	442	23.9	433
7		TeraG	8	344	420	21.6	960	46	45	15.6	3
				355	439	23.6	951			68
				489	380	17.7	1034
7		Manual	8	343	420	21.6	971	44
				353	452	25	1010
				382	468	26.8	1054
7		Nothing	15	345	456	25.5	1213	46
				336	480	28.2	1038
				387	487	29.1	984
8		Manual	37	402	316	12.2	581	23	70	33.1	4
				410	338	14	571			86
				445	345	14.6	526
8		Nothing	60	409	310	11.8	508	35
				395	310	11.8	523
				376	317	12.3	497
8		TheraG	40	405	277	9.4	567	33
				459	310	11.8	514
				440	331	13.4	578
9		Nothing	37	597	408	20.4	421	29	50	19.1	3
				573	380	17.7	487			73
				579	430	22.7	632
9		TheraG	28	597	434	23.1	701	44
				573	404	20	688
				627	451	24.9	562
9		Manual	33	527	424	22	690	44
				520	431	22.8	582
				631	424	22	646
10		TeraG	13	337	430	22.7	568	61	70	33	3
				328	444	24.2	655			86
				339	463	26.3	724
10		Manual	10	302	421	21.7	806	61
				296	439	23.6	738
				275	432	22.9	765
10		Nothing	15	298	432	19.9	778	59
				309	403	21.2	738
				296	416	20.3	817
11		Manual	53	449	331	13.4	676	21	25	1.25	3
				380	357	15.6	626			54
				362	341	14.3	624
11		Nothing	55	433	363	16.2	661	20
				433	351	15.1	498
				478	347	14.8	607
11		TheraG	45	382	365	16.3	679	21
				344	369	16.7	607
				363	370	16.8	545
12		Nothing	25	517	361	16	552	35	45	15	4
				520	376	17.3	491			68
				609	363	16.2	447
12		TheraG	9	461	306	11.5	502	28
				450	320	12.6	597
				436	303	11.3	469
12		Manual	41	527	301	11.1	576	40
				489	299	11	540
				494	330	13.3	531
13		TeraG	6	384	461	26.1	641	39	55	22.6	3
				366	473	27.4	560			76
				387	474	27.5	490
13		Manual	18	401	486	29	477	41
				397	491	29.6	540
				376	502	30.9	509
13		Nothing	13	382	492	29.7	421	30
				394	484	28.7	473
				396	468	26.8	390
14		Manual	55	565	380	17.7	248	32	10	0	3
				488	385	18.2	284			53
				505	381	17.8	312
14		Nothing	21	476	392	18.8	340	24
				476	400	19.6	364
				452	392	18.8	293
14		TheraG	10	514	378	17.5	409	40
				453	351	15.1	408
				503	376	17.3	331
15		Nothing	27	356	409	20.6	573	26	20	0	3
				450	390	19.1	565			53
				317	404	19.9	551
15		TheraG	20	407	401	19.7	680	27
				397	428	22.5	632
				418	426	22.2	600
15		Manual	28	374	396	19.2	606	28
				381	420	21.6	628
				409	416	21.2	562
16		TeraG	10	356	411	20.7	898	47	80	40	3
				356	427	22.4	941			93
				345	450	24.8	938
16		Manual	15	358	444	24.2	991	38
				338	455	25.4	857
				324	460	25.9	879
16		Nothing	11	325	444	24.2	963	48
				302	457	25.6	990
				322	471	27.2	931
17		Manual	15	528	418	21.4	783	29	55	22.6	3
				627	400	19.6	712			76
				623	408	20.4	668
17		Nothing	16	520	414	21	682	31
				550	414	21	726
				544	417	21.3	677
17		TheraG	9	563	434	23.1	750	37
				597	427	22.4	743
				617	425	22.1	773
18		Nothing	11	385	420	21.6	541	52	15	0	3
				409	411	20.7	518			53
				374	428	22.5	509
18		TheraG	6	378	396	19.2	622	58
				341	392	18.8	545
				378	393	18.9	502
18		Manual	5	353	431	22.8	548	53
				348	406	20.2	541
				328	406	20.2	559
19		TeraG	20	331	304	11.3	631	31	30	5	4
				312	319	12.5	544			83
				324	348	14.8	615
19		Manual	20	332	292	10.5	491	32
				353	232	13.5	603
				329	332	13.5	594
19		Nothing	22	311	325	12.9	584	42
				302	324	12.9	877
				325	345	14.6	687
